# Supplementary material for: The first 3-D ferrimagnetic nickel fumarate with an open framework: [Ni3(OH)2(O2C–C2H2–CO2)(H2O)4]·2H2O
Source: Royal Society of Chemistry journal article supplement (doi:10.1039/b207133a), 2002-01-01
Supplement: b207133a.doc [file b207133a.doc]

**SUPPLEMENTARY MATERIALS FOR COMPOUND**

[Ni3(O2C-(CH)2-CO2)2(OH)2(H2O)4] , 2H2O (1)

**Table 1 :** Crystal data and structure refinement parameters for

[Ni3(O2C-(CH)2-CO2)2(OH)2(H2O)4].2H2O**(1)**.

| Formula | **Ni3 C8 H18 Co3 O16** |
| --- | --- |
| Chemical formula weight (g.mol-1) | 546.2 |
| Calculated density (g.cm-3) | 2 |
| Crystal system | monoclinic |
| Space group | *P* 21/*c* |
| *a* (Å) | 6.5560(3) |
| *b* (Å) | 8.1194(3) |
| *c* (Å) | 15.5027(6) |
| ** (°) | 96.369(3) |
| *V* (Å3) | 820.13(5) |
| Figures of Merit | *M*20 = 124 *F*20 = 270 (0.0021, 36) |
| *Z* | 2 |
| Radiation (Å) | 1.5418 |
| 2** range (°) | 10 - 80 |
| No. reflections | 498 |
| No. atoms | 14 |
| No. structural parameters | 42 |
| *R*P | 0.097 |
| *R*WP | 0.122 |
| *R*B | 0.089 |
| *R*F | 0.071 |

**Table 2:** *Positional Parameters and their standard deviations*

| Atome | x | y | z | *B* (Å2) |
| --- | --- | --- | --- | --- |
| Ni1  Ni2  OH1  O1  O2  O3  O4  Ow1  Ow2  C1  C2  C3  C4  Ow3 | 0.4834(6)  0  0.305(2)  0.957(2)  0.642(1)  -0.007(2)  0.328(1)  0.662(2)  0.273(2)  0.173(2)  0.119(2)  -0.077(2)  0.141(2) 0.488(2) | 0.1761(4)  0  0.016(1)  0.216(1)  0.255(1)  0.134(1)  0.124(1)  0.324(1)  0.361(1)  0.744(2)  0.677(2)  0.699(2)  0.160(2) 0.411(1) | -0.0235(3)  0  0.0399(7)  0.0689(7)  0.0931(8)  -0.1192(7)  -0.1488(7)  -0.1031(7)  0.9947(7)  -0.1203(8)  0.7873(8)  0.7585(8)  -0.1664(7) 0.7384(7) | 1.2(1) a  1.2(1) a  1.5(1) b  1.5(1) b  1.5(1) b  1.5(1) b  1.5(1) b  1.5(1) b  1.5(1) b  1.5(1) b  1.5(1) b  1.5(1) b  1.5(1) b  1.5(1) b |

a and b  allowed to vary in the same manner

**Table 3 : Selected bonds lengths (Å) and angles (°) for (1).**

(Ni1)-(OH1) 2.07(1)

(Ni1)-(OH1)a 2.12(1)

(Ni1)-(O2) 2.09(1)

(Ni1)-(O4) 2.13(1)

(Ni1)-(Ow1) 2.16(1)

(Ni1)-(Ow2)b 2.08(1)

(Ni2)-(OH1) 2.03(1)

(Ni2)-(OH1)c 2.03(1)

(Ni2)-(O1)d 2.09(1)

(Ni2)-(O1)a 2.09(1)

(Ni2)-(O3) 2.14(1)

(Ni2)-(O3)c  2.14(1)

(O1)-(C1)e 1.27(2)

(O2)-(C1)e 1.23(1)

(O3)-(C4) 1.30(2)

(O4)-(C4) 1.26(1)

(C1)-(O1)e 1.27(2)

(C1)-(O2)e 1.23(1)

(C1)-(C2)b 1.53(2)

(C2)-(C3) 1.33(2)

(C3)-(C4)g 1.48(2)

(C4)-(O3) 1.29(2)

(C4)-(O4) 1.26(1)

(OH1)-(Ni1)-(OH1)a 90.3(7)

(OH1)-(Ni1)-(O2) 92.1(7)

(OH1)-(Ni1)-(O4) 94.0(8)

(OH1)-(Ni1)-(Ow1) 173.1(9)

(OH1)-(Ni1)-(Ow2)b 88.4(7)

(OH1)a-(Ni1)-(O2) 93.4(8)

(OH1)a-(Ni1)-(O4) 89.8(7)

(OH1)a-(Ni1)-(Ow1) 86.4(7)

(OH1)a-(Ni1)-(Ow2)b 178.7(9)

(O2)-(Ni1)-(O4) 173(1)

(O2)-(Ni1)-(Ow1) 94.2(8)

(O2)-(Ni1)-(Ow2)b 86.3(7)

(O4)-(Ni1)-(Ow1) 79.9(6)

(O4)-(Ni1)-(Ow2)b 90.6(7)

(Ow1)-(Ni1)-(Ow2)b 94.9(7)

(OH1)-(Ni2)-(OH1)c 180.0

(OH1)-(Ni2)-(O1)d 88.5(7)

(OH1)c-(Ni2)-(O1)a 88.5(7)

(OH1)-(Ni2)-(O1)a 91.5(7)

(OH1)c-(Ni2)-(O1)d 91.5(7)

(OH1)-(Ni2)-(O3) 99.0(8)

(OH1)c-(Ni2)-(O3)c 99.0(8)

(OH1)-(Ni2)-(O3)c 81.0(7)

(OH1)c-(Ni2)-(O3) 81.0(7)

(O1)d-(Ni2)-(O1)a 180.0

(O1)d-(Ni2)-(O3) 91.4(7)

(O1)a-(Ni2)-(O3)c 91.4(7)

(O1)a-(Ni2)-(O3) 88.6(7)

(O1)d-(Ni2)-(O3)c 88.6(7)

(O3)-(Ni2)-(O3)c 180.0

(O1)-(C1)e-(O2) 119(1)

(O1)-(C1)e-(C2)f 125(2)

(O2)-(C1)e-(C2)f 116(2)

(C1)-(C2)b-(C3)b 112(1)

(C2)-(C3)-(C4)g 117(1)

(C3)h-(C4)-(O3) 116(1)

(C3)h-(C4)-(O4) 115(1)

(O3)-(C4)-(O4) 128(1)

Symmetry transformations used to generate equivalent atoms:

a : 1-x ; -y ; -z

b : x ; y ; z-1

c : -x ; -y ; -z

d : x-1 ; y ; z

e : 1-x ; 1-y ; -z

f : 1-x ; 1-y ; 1-z

g : -x ; y+1/2 ;-z+1/2

h : -x ; y-1/2 ;-z+1/2
